# Supplementary material
Source: publisher figshare collection journal article supplement (https://acs.figshare.com/ndownloader/files/17790332)
Supplement: Supplementary file 1 [file 17790332]

## SUPPORTING INFORMATION

### **Microscopic Viscosity of Neuronal Plasma Membranes Measured Using Fluorescent Molecular Rotors: Effects of Oxidative Stress and Neuroprotection**

Markéta Kubánková<sup>1</sup>, Peter A. Summers<sup>1</sup>, Ismael López-Duarte<sup>1</sup>, Darya Kiryushko<sup>2,3</sup> and Marina K. Kuimova<sup>1</sup>

Addresses:

<sup>1</sup>Chemistry Department, Imperial College London, Exhibition Road, London SW7 2AZ, UK

<sup>2</sup>Department of Materials and London Center for Nanotechnology, Imperial College, Exhibition Road, SW72AZ London, UK

<sup>3</sup>Centre for Neuroinflammation and Neurodegeneration, Imperial College London, Hammersmith Hospital Campus, Burlington Danes Building, 160 Du Cane Road, W12 0NN London, UK

Corresponding author:

Dr Marina K Kuimova, [m.kuimova@imperial.ac.uk](mailto:m.kuimova@imperial.ac.uk)

tel +44 (207) 5948558

fax +44 (207) 5945804

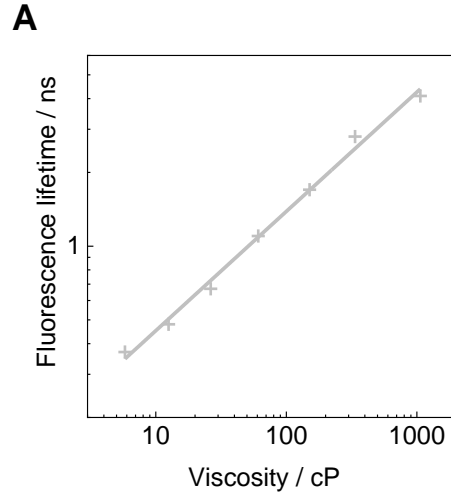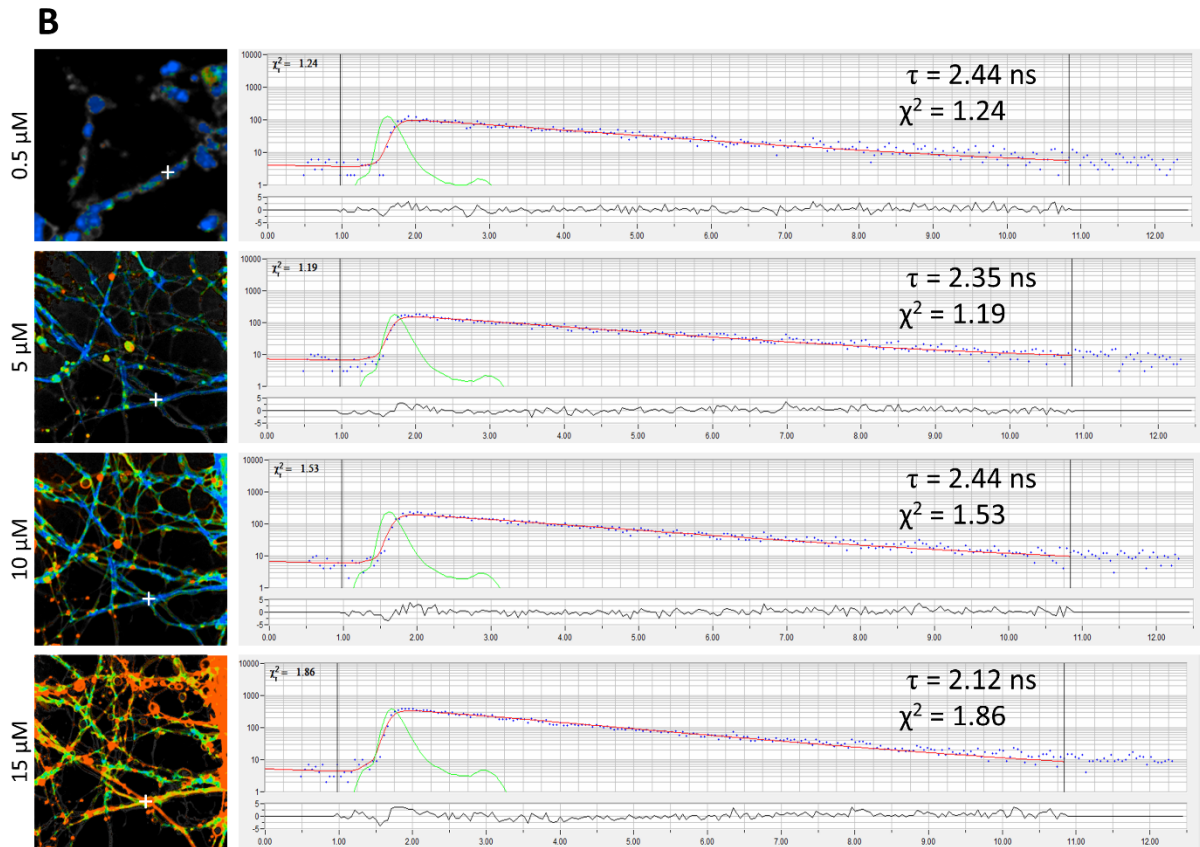

**Figure S1 A)** The fluorescence lifetime vs. viscosity calibration of BODIPY **1** in mixtures of methanol and glycerol of varying viscosities. **B)** Example FLIM maps and decays of neurons incubated with BODIPY **1** at 0.5, 5, 10 and 15  $\mu\text{M}$ . The '+' sign indicates the position of the pixel of the fluorescence decay. The instrument response function is shown in green. We note that at concentrations below 0.5  $\mu\text{M}$  the images are too faint for FLIM (on reasonable time scales), while above 10  $\mu\text{M}$  a significant number of points appear where a bi-exponential model is required to fit the decays. This increase in  $\chi^2$  for higher incubation concentrations of BODIPY **1** is accompanied by the shortening of the detected lifetime. Based on our previous significant experience with BODIPY dyes<sup>1,2</sup> we assign these bi-exponential decays to dye aggregation.

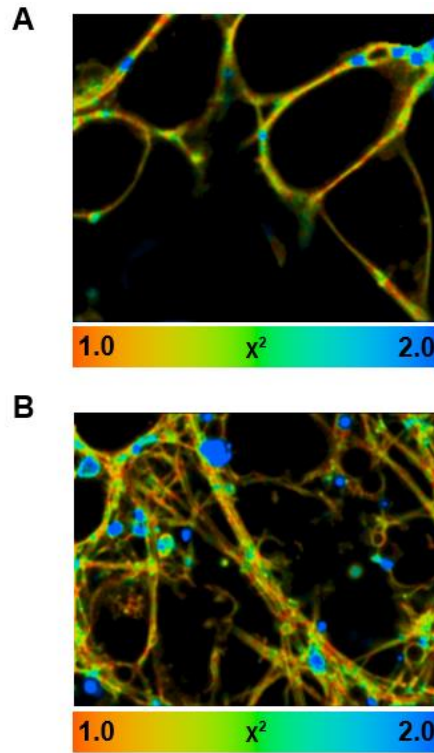

**Figure S2 A)** The  $\chi^2$  map of the FLIM image in Figure 3A (main text). **B)** The  $\chi^2$  map of the FLIM image in Figure 3B (main text). The values of  $\chi^2$  in the somata and neurites are between 1.0 – 1.4, confirming the correct use of mono-exponential fitting.

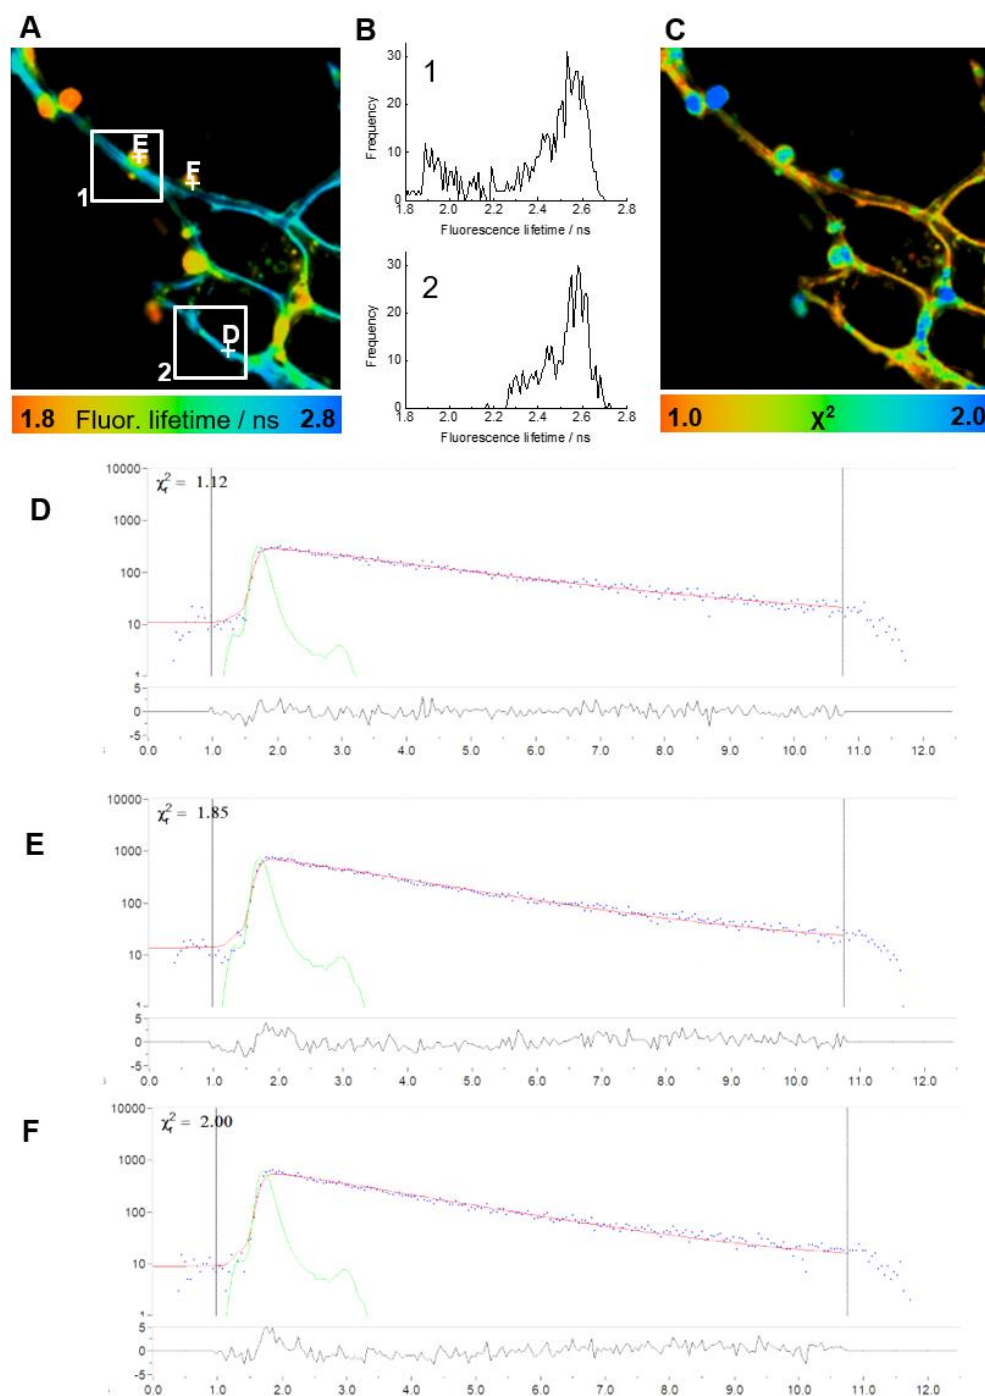

**Figure S3** The fluorescence lifetime of BODIPY 1 in different regions of neuronal plasma membranes (mono-exponential fitting). **A)** The microscopic viscosity of the axon (1) is identical to the soma (2). **B)** The fluorescence lifetime distributions of the two regions show good overlap, apart from the low lifetime contribution of a spherical vesicle in region (1). **C)** The corresponding  $\chi^2$  map. Although  $\chi^2$  values are in the correct range in neurites and somata and confirm the correct use of mono-exponential fitting, the values are too high in the vesicles, requiring the use of bi-exponential fitting. **D)** The fluorescence decay in pixel 'D' in FLIM A) is overlaid with a mono-exponential fit (red) with a good  $\chi^2 = 1.12$ . **E)** The decay in pixel 'E' in FLIM A) is overlaid with a mono-exponential fit (red) with  $\chi^2 = 1.85$ , demonstrating the unsuitability of mono-exponential fitting. **F)** The decay in pixel 'F' in FLIM A) is overlaid with a mono-exponential fit (red) with  $\chi^2 = 2.00$ , demonstrating the unsuitability of mono-exponential fitting.

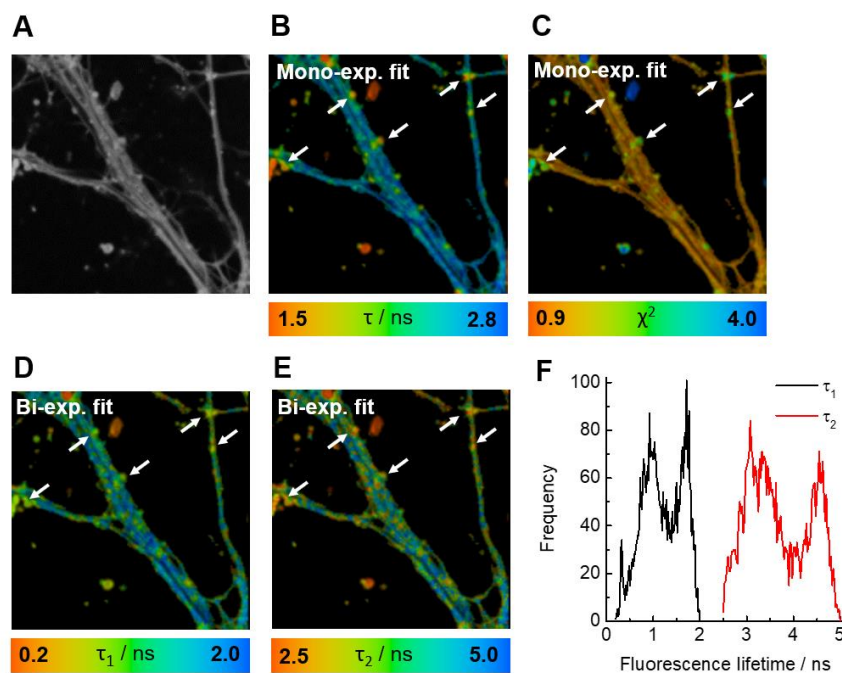

**Figure S4** **A)** The fluorescence intensity image of BODIPY **1** in an axon with visible ‘hot spots’. **B)** Mono-exponential fit of the FLIM, revealing the low fluorescence lifetime of ‘hot spots’ (marked by white arrows) relative to the axon. **C)** The high values of the  $\chi^2$  goodness-of-fit parameter demonstrate that a mono-exponential decay is not a suitable model for the behaviour of BODIPY **1** in ‘hot spots’. **D,E)** Here, the FLIM image was analysed using bi-exponential fitting required for a satisfactory goodness-of-fit in ‘hot spots’. Shown are the lifetime maps of the two components  $\tau_1$  and  $\tau_2$ . Both components exhibit lower lifetime in dendritic spines compared to the surrounding membrane. **F)** The bimodal distributions of  $\tau_1$  and  $\tau_2$  in the FLIM image analysed using bi-exponential fitting; the lower values originate from ‘hot spots’, higher values from the axon.  $\tau_1$  and  $\tau_2$  values at *ca.* 1 and 3 ns correspond to dendritic spines, while the higher values (nearly 2 ns and 4.5 ns) correspond to the ‘bulk’ of the axon. Of note, the multi-exponentiality observed in these ‘hot spots’ is potentially due to excessive dye accumulation and its aggregation as a result. It is well known that the aggregation of BODIPY dyes causes self-quenching of fluorescence and significant deviations of time resolved traces from the mono-exponential fit. In such case, the obtained lifetime values are no longer representative of the microviscosity.<sup>1,2</sup>

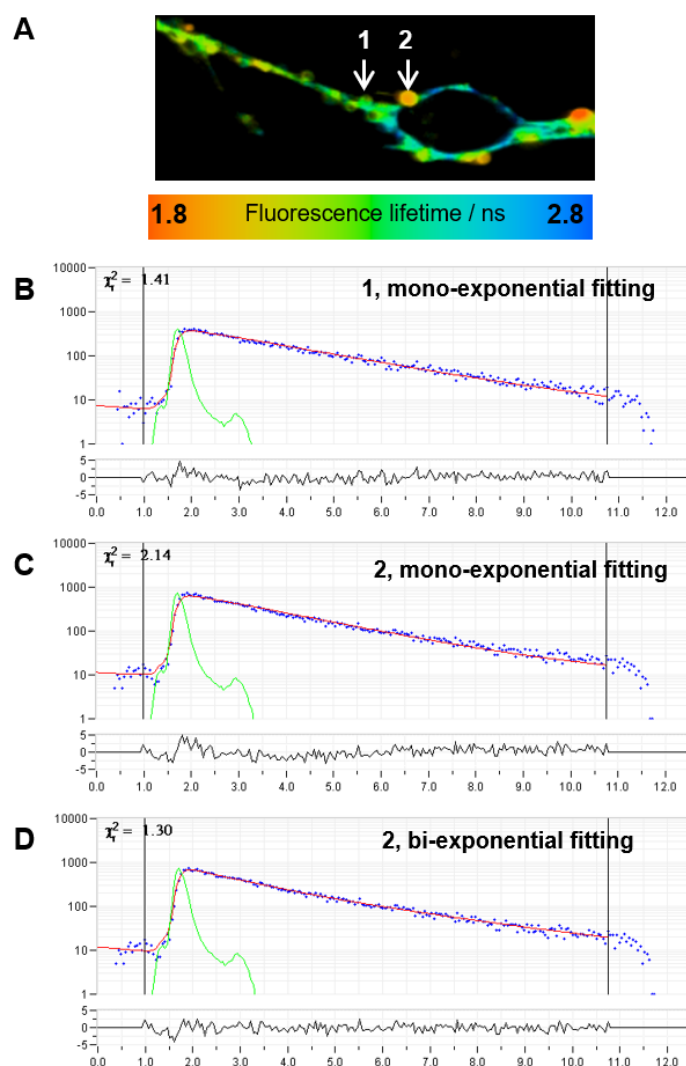

1

2 **Figure S5 A)** FLIM image of a neuron incubated with BODIPY **1**. The arrow 1 in FLIM A) shows the position  
3 of the pixel of the fluorescence decay in B), arrow 2 shows the position of the pixel of the fluorescence decay in  
4 C,D). **B)** The decay from pixel 1 in FLIM A) is overlaid with a mono-exponential fit (red) with  $\chi^2 = 1.41$ . **C)**  
5 The decay in pixel 2 in FLIM A) is overlaid with a mono-exponential fit (red) with  $\chi^2 = 2.14$ . **D)** The decay in  
6 pixel 2 of FLIM A) is overlaid with a bi-exponential fit (red) with  $\chi^2 = 1.3$ . The instrument response functions  
7 are shown in green.



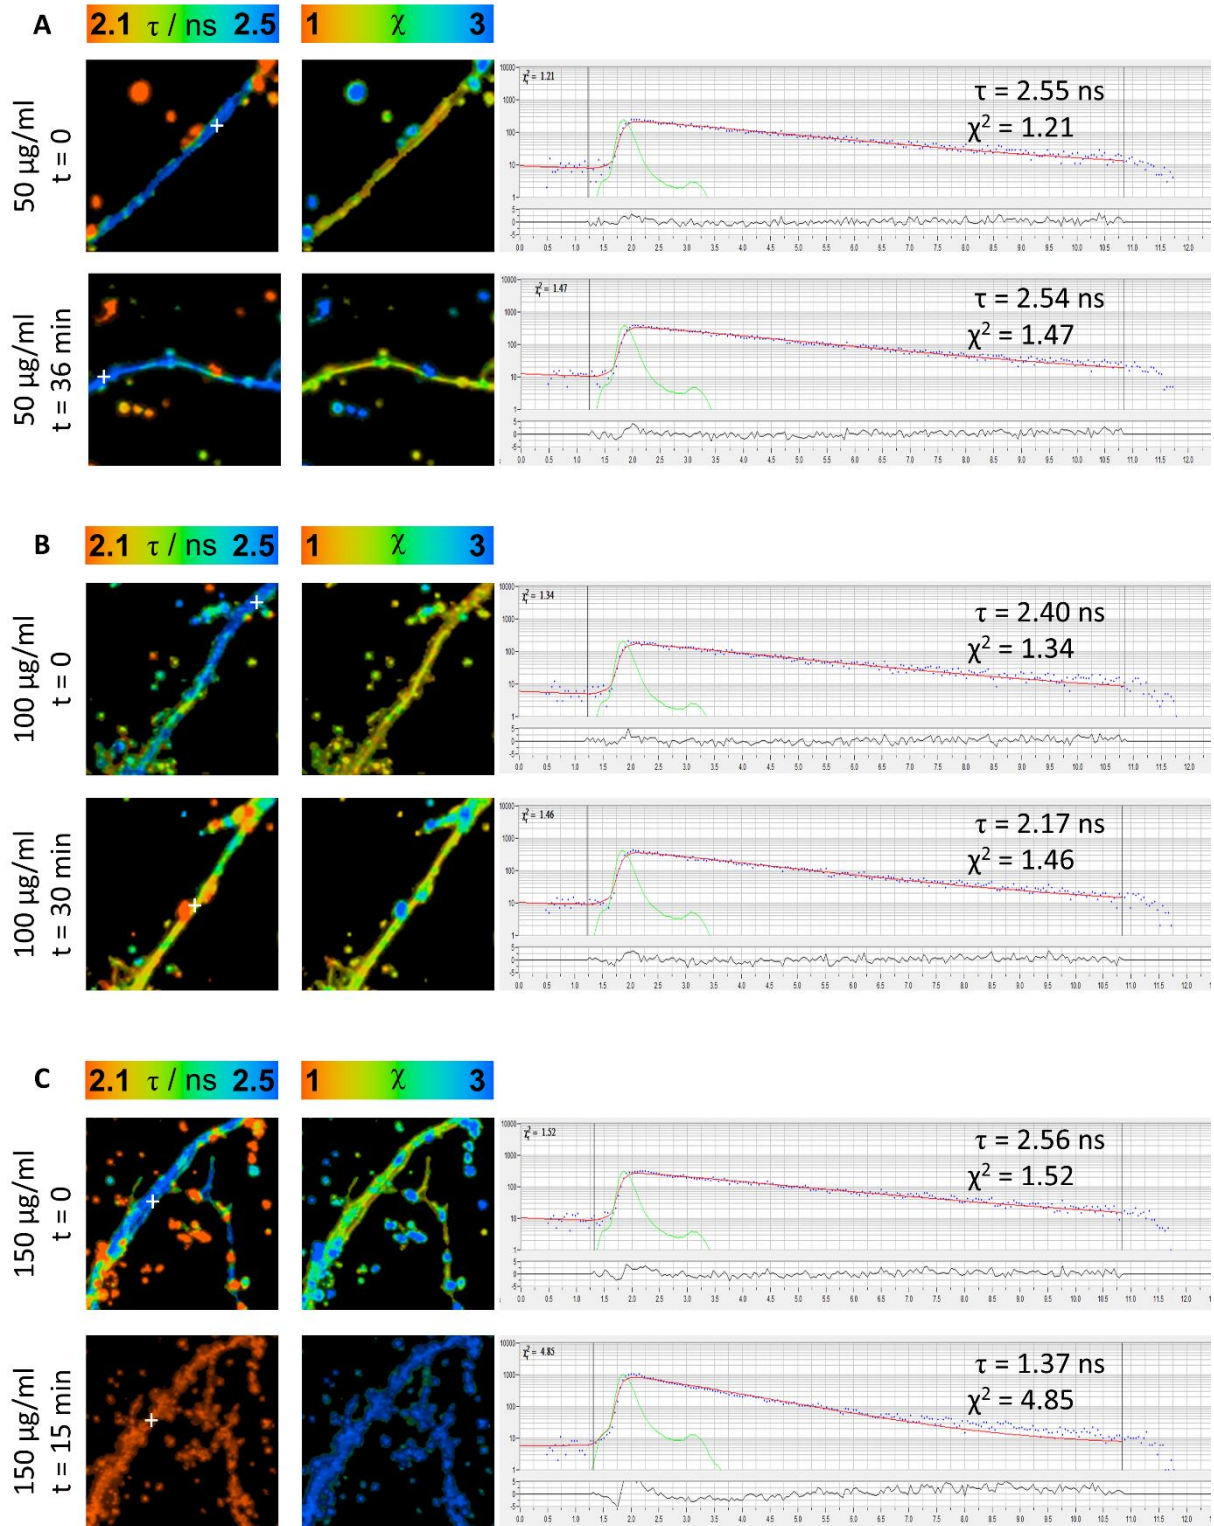

**Figure S6** FLIM images,  $\chi^2$  maps, and sample decays following mono-exponential decay fitting of neurons incubated with BODIPY 1 and kainic acid at **A)** 50  $\mu\text{g/ml}$ , **B)** 100  $\mu\text{g/ml}$  and **C)** 150  $\mu\text{g/ml}$ . The white '+' sign indicates the position of the pixel of the fluorescence decay. The instrument response function is shown in green.

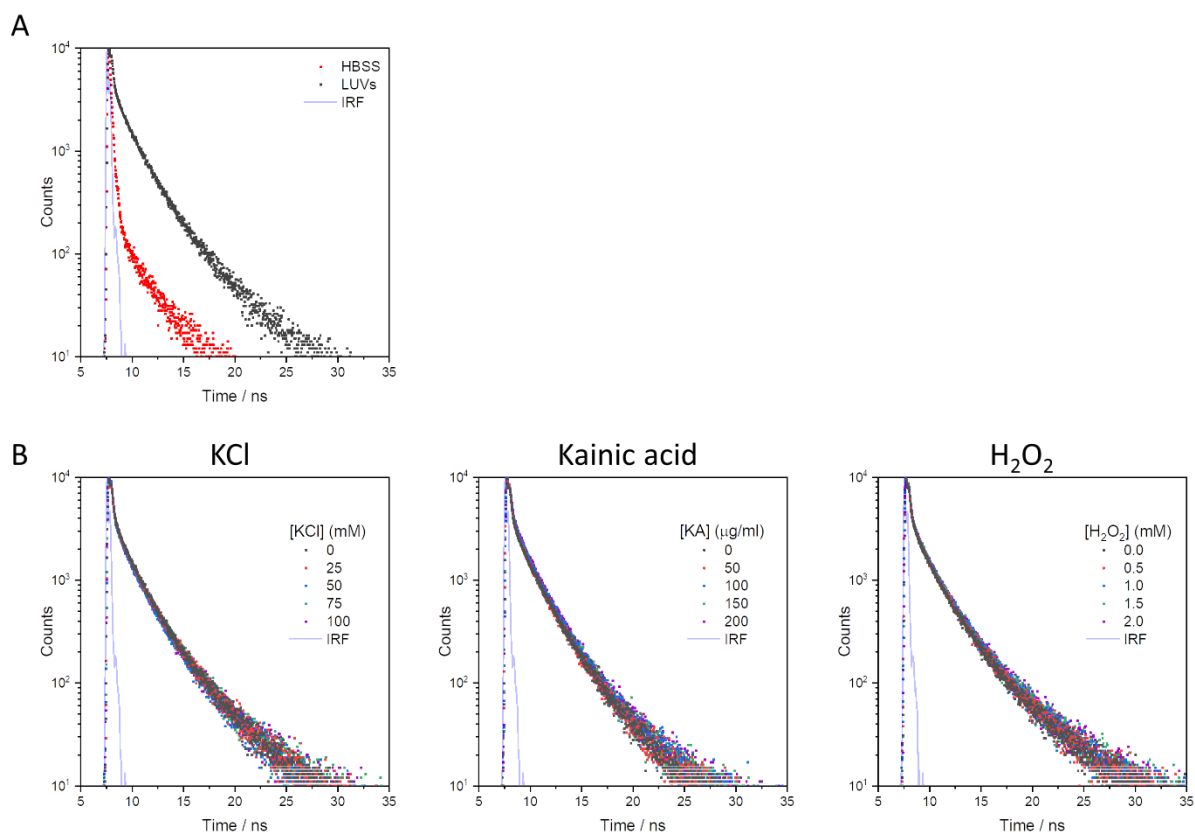

1

2 **Figure S7** Fluorescence lifetime decays of BODIPY **1** in **A**) aqueous buffer HBSS, and **B**) LUV model lipid  
3 bilayers (composed of unsaturated lipid DOPC) during treatment with KCl (0, 25, 50, 75 and 100 mM), KA (0,  
4 50, 100, 150 and 200  $\mu\text{g/ml}$ ) and H<sub>2</sub>O<sub>2</sub> (0.0, 0.5, 1.0, 1.5 and 2.0 mM).  $\lambda_{\text{ex}} = 404 \text{ nm}$ ,  $\lambda_{\text{em}} = 515 \text{ nm}$  ( $\pm 16 \text{ nm}$ ),  
5 420 and 495 nm long pass cut off filter were placed between the sample and detector.



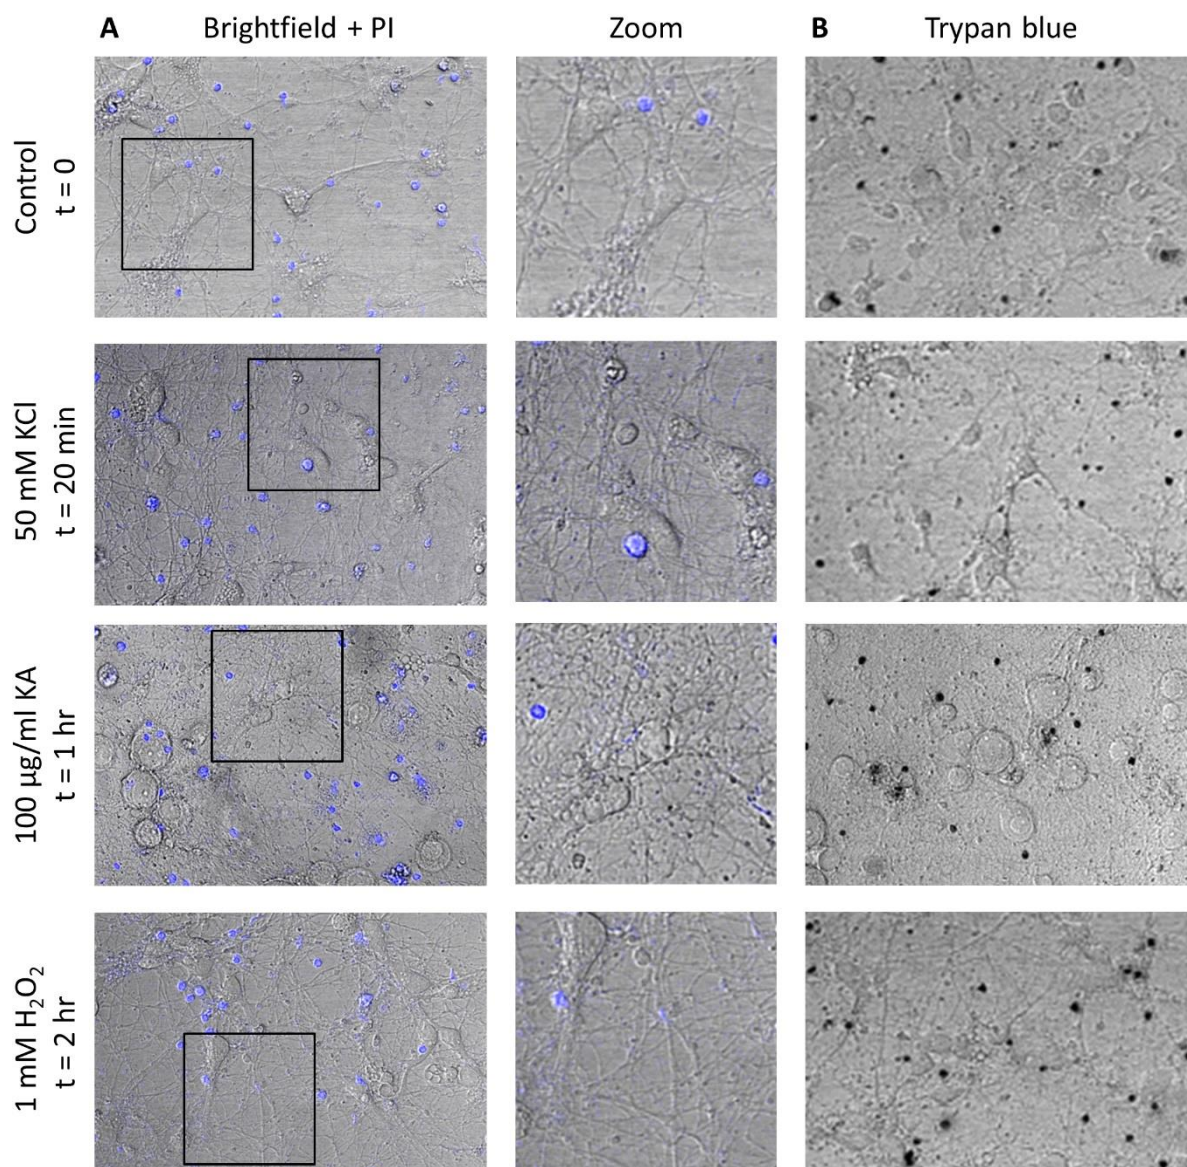

**Figure S8** Propidium iodide (PI) and trypan blue assays to test cell viability after KCl (50 mM, 20 min), KA (100 µg/ml, 1 hr) and H<sub>2</sub>O<sub>2</sub> (1 mM, 2 hr) treatment in HBSS. **A)** Left: Brightfield and PI (blue) merge images after staining with PI (12.5 µg/ml, 2 min,  $\lambda_{\text{ex}} = 458 \text{ nm}$ ,  $\lambda_{\text{em}} = 600\text{-}800 \text{ nm}$ ). Right: Enlarged area marked in the left panel by black squares. **B)** Brightfield images from a different area of the same cultures after staining with trypan blue (1:1 dilution, 2 min). Images taken at 20x magnification.

## References

- (1) Wu, Y.; Štefl, M.; Olżyńska, A.; Hof, M.; Yahioğlu, G.; Yip, P.; Casey, D. R.; Ces, O.; Humpolíčková, J.; Kuimova, M. K. Molecular Rheometry: Direct Determination of Viscosity in Lo and Ld Lipid Phases via Fluorescence Lifetime Imaging. *Phys. Chem. Chem. Phys.* **2013**, *15* (36), 14986.
- (2) Mika, J. T.; Thompson, A. J.; Dent M. R.; Brooks N. J.; Michiels J.; Hofkens J.; Kuimova M.K. Measuring the Viscosity of the Escherichia coli Plasma Membrane Using Molecular Rotors. *Biophys. J.* **2015**, *111* (7), 1528-1540.
